# Supplementary material for: Molecular basis for polysaccharide recognition and modulated ATP hydrolysis by the O antigen ABC transporter
Source: PubMed Central journal article supplement (PMC9445017; doi:10.1038/s41467-022-32597-2), 2022-09-05
Supplement: 41467_2022_32597_MOESM3_ESM.pdf [file 41467_2022_32597_MOESM3_ESM.pdf]

File name: Supplementary Movie 1

Description: Conformational changes of WzmWzt upon ATP binding.
